# Supplementary material for: Experimental and Numerical Investigation of Moment Capacity of Cold-Formed Steel Built-Up Box Beam with Self-Drilling Screw Connection
Source: Research Square preprint supplement (doi:10.21203/rs.3.rs-7291060/v1), 2025-08-20
Supplement: Supplementary file 1 [file 076887b7ddaa1eb84f686e5c.docx]

Three cold-formed steel built-up box beams with different tie constraint at screws spacing, namely H WF, 2H WF, and 5.5H WF, were subjected to four-point flexural loading.

The load-vertical displacement, and their moment-curvature relationship of the beam specimens are illustrated in **Figure S-1 and Figure S-2** below.All specimens exhibit almost similar initial stiffness. Even though, the 5.5H WF beam presents highest flexural stiffness compared to those H WF and 2H WF stiffness. Most of them reach peak loads between **6000 and 6700 N,** and peak moments between **1300000 and 1500000 N.mm**.

Besides the stiffness, to establish the optimum tie constraint at screws spacing is also based on two other conditions. The first condition is defined by the smallest linear vertical displacement at the beam’s mid-span under the maximum elastic load of 6000 N, as presented in **Table S-1**. At this condition, 5.5H WF beam shows the smallest vertical displacement. The second condition is the least total number of tie constraints, as presented in **Table S-2.** The number of tie constraint at screws in the H WF and 2H WF beam specimens is considerably higher than that in the 5.5H WF beam specimen.

**Fig. S-1** The load-vertical displacement of H, 2H, and 5.5H built-up box beam specimens

**Fig. S-2** The moment-curvature of H, 2H, and 5.5H built-up box beam specimens

**Table S-1** Vertical displacement of H, 2H, and 5.5H built-up box beam specimens correspond to maximum load (P) 6000 N

| Specimen | Vertical displacement | |
| --- | --- | --- |
| δEXP (mm) | δEXP deviation to 5.5H (%) |
| H WF | 4.21 | 23.10 |
| 2H WF | 3.83 | 11.99 |
| 5.5H WF | 3.42 | 0.00 |

**Table S-2** Tie constraint at screws number comparison between H, 2H, and 5.5H built-up box beam specimens

| Specimen | Number of tie constraint at screws | Percentage of tie constraints at the screws number relative to 5.5H (%) |
| --- | --- | --- |
| H WF | 36 | 350 |
| 2H WF | 20 | 150 |
| 5.5H WF | 8 | 100 |
